# Supplementary material
Source: PubMed Central journal article supplement (PMC2701567)
Supplement: NIHMS109222-supplement-1_si_001.pdf [file NIHMS109222-supplement-1_si_001.pdf]

## Supporting Information

### List of Contents

**Table 1S.** Levels of POB-DNA adducts in the nasal olfactory mucosa, nasal respiratory mucosa, oral mucosa, and pancreas of NNK-, (*R*)-NNAL-, and (*S*)-NNAL-treated rats.

**Table 2S.** Levels of PHB-DNA adducts in the nasal olfactory mucosa, nasal respiratory mucosa, oral mucosa, and pancreas of NNK-, (*R*)-NNAL-, and (*S*)-NNAL-treated rats.

**Table 1S.** Levels of POB-DNA adducts in the nasal olfactory mucosa, nasal respiratory mucosa, oral mucosa, and pancreas of NNK-, (R)-NNAL-, and (S)-NNAL-treated rats.

**A. Nasal olfactory mucosa**

| Treatment | Time (weeks) | POB-DNA adducts (fmol/mg DNA)  |             |                                 |                                 | Total      |
|-----------|--------------|--------------------------------|-------------|---------------------------------|---------------------------------|------------|
|           |              | <i>O</i> <sup>2</sup> -POB-Cyt | 7-POB-Gua   | <i>O</i> <sup>2</sup> -POB-dThd | <i>O</i> <sup>6</sup> -POB-dGuo |            |
| NNK       | 1            | ND <sup>a</sup>                | 63.8 ± 22.7 | 93.0 ± 21.6                     | 3.6 ± 5.1                       | 160 ± 49   |
|           | 2            | ND                             | 91.5 ± 4.1  | 141 ± 21                        | 3.6 ± 5.0                       | 236 ± 12   |
|           | 5            | ND                             | 104 ± 16    | 266 ± 22                        | 3.9 ± 5.5                       | 373 ± 11   |
|           | 10           | 3.7 ± 0.7                      | 67.8 ± 12.9 | 261 ± 26                        | 1.1 ± 1.9                       | 333 ± 37   |
|           | 16           | ND                             | 60.0 ± 7.8  | 277 ± 28                        | ND                              | 337 ± 36   |
|           | 20           | ND                             | 63.9 ± 20.3 | 295 ± 22                        | ND                              | 359 ± 43   |
| (R)-NNAL  | 1            | ND                             | 4.8 ± 6.8   | ND                              | ND                              | 4.8 ± 6.8  |
|           | 2            | ND                             | 10.2 ± 1.3  | 26.5 ± 2.3                      | ND                              | 36.7 ± 1.0 |
|           | 5            | ND                             | 8.8 ± 0.1   | 31.2 ± 3.8                      | ND                              | 40.0 ± 3.7 |
|           | 10           | ND                             | 10.1 ± 0.8  | 42.6 ± 2.1                      | ND                              | 52.7 ± 1.2 |
|           | 16           | ND                             | 8.4 ± 0.1   | 39.7 ± 3.6                      | ND                              | 48.1 ± 3.6 |
|           | 20           | ND                             | 5.4 ± 0.2   | 33.3 ± 4.0                      | ND                              | 38.7 ± 3.8 |
| (S)-NNAL  | 1            | ND                             | 75.0 ± 0.9  | 90.3 ± 4.9                      | 3.1 ± 4.4                       | 168 ± 10   |
|           | 2            | ND                             | 94.0 ± 13.3 | 137 ± 6                         | 4.3 ± 6.1                       | 236 ± 25   |
|           | 5            | ND                             | 80.8 ± 0.2  | 231 ± 6                         | 3.0 ± 4.2                       | 315 ± 10   |
|           | 10           | 0.8 ± 1.4                      | 61.8 ± 15.4 | 230 ± 65                        | 2.2 ± 3.8                       | 295 ± 77   |
|           | 16           | ND                             | 49.6 ± 13.0 | 235 ± 47                        | ND                              | 285 ± 60   |
|           | 20           | ND                             | 47.8 ± 3.1  | 235 ± 30                        | ND                              | 283 ± 33   |

**B. Nasal respiratory mucosa**

| Treatment | Time (weeks) | POB-DNA adducts (fmol/mg DNA)  |             |                                 |                                 | Total       |
|-----------|--------------|--------------------------------|-------------|---------------------------------|---------------------------------|-------------|
|           |              | <i>O</i> <sup>2</sup> -POB-Cyt | 7-POB-Gua   | <i>O</i> <sup>2</sup> -POB-dThd | <i>O</i> <sup>6</sup> -POB-dGuo |             |
| NNK       | 1            | 35.9 ± 51.3                    | 322 ± 232   | 355 ± 216                       | 40.4 ± 35.5                     | 753 ± 503   |
|           | 2            | 19.9 ± 34.4                    | 461 ± 236   | 694 ± 335                       | 59.6 ± 58.9                     | 1235 ± 630  |
|           | 5            | 37.4 ± 29.5                    | 561 ± 284   | 1048 ± 474                      | 48.2 ± 22.4                     | 1695 ± 791  |
|           | 10           | 18.6 ± 3.5                     | 518 ± 63    | 1462 ± 325                      | 49.2 ± 24.7                     | 2048 ± 387  |
|           | 16           | 29.2 ± 14.3                    | 495 ± 187   | 1761 ± 672                      | 61.7 ± 44.5                     | 2316 ± 908  |
|           | 20           | 24.7 ± 29.0                    | 433 ± 267   | 1617 ± 831                      | 36.3 ± 32.5                     | 2111 ± 1129 |
| (R)-NNAL  | 1            | ND                             | 29.1 ± 5.8  | 35.8 ± 13.1                     | ND                              | 64.9 ± 18.9 |
|           | 2            | ND                             | 49.9 ± 14.2 | 75.3 ± 13.1                     | ND                              | 125 ± 27    |
|           | 5            | ND                             | 55.6 ± 26.5 | 125 ± 38                        | ND                              | 180 ± 64    |
|           | 10           | ND                             | 58.0 ± 12.8 | 185 ± 53                        | ND                              | 243 ± 66    |
|           | 16           | ND                             | 44.2 ± 23.9 | 172 ± 52                        | ND                              | 217 ± 72    |
|           | 20           | ND                             | 42.7 ± 13.5 | 195 ± 44                        | ND                              | 238 ± 57    |
| (S)-NNAL  | 1            | 5.7 ± 9.9                      | 307 ± 141   | 370 ± 121                       | 41.4 ± 24.6                     | 724 ± 291   |
|           | 2            | 35.1 ± 60.8                    | 493 ± 139   | 704 ± 132                       | 64.7 ± 20.6                     | 1297 ± 339  |
|           | 5            | ND                             | 633 ± 27    | 1338 ± 20                       | 94.6 ± 5.5                      | 2066 ± 13   |
|           | 10           | 8.6 ± 7.5                      | 403 ± 112   | 1258 ± 481                      | 51.9 ± 35.8                     | 1722 ± 615  |
|           | 16           | 11.0 ± 9.7                     | 396 ± 152   | 1415 ± 554                      | 38.5 ± 28.5                     | 1860 ± 726  |
|           | 20           | 33.4 ± 17.6                    | 377 ± 172   | 1451 ± 581                      | 41.1 ± 27.7                     | 1902 ± 784  |

### C. Oral mucosa

| Treatment | Time (weeks) | POB-DNA adducts (fmol/mg DNA)  |             |                                 |                                 |             |
|-----------|--------------|--------------------------------|-------------|---------------------------------|---------------------------------|-------------|
|           |              | <i>O</i> <sup>2</sup> -POB-Cyt | 7-POB-Gua   | <i>O</i> <sup>2</sup> -POB-dThd | <i>O</i> <sup>6</sup> -POB-dGuo | Total       |
| NNK       | 1            | ND                             | 10.5 ± 18.2 | 59.6 ± 16.9                     | ND                              | 70.1 ± 30.4 |
|           | 2            | ND                             | 37.6 ± 33.5 | 101 ± 19                        | 2.3 ± 3.9                       | 141 ± 19    |
|           | 5            | ND                             | 55.6 ± 12.4 | 177 ± 30                        | ND                              | 232 ± 18    |
|           | 10           | ND                             | 49.0 ± 19.0 | 216 ± 15                        | ND                              | 265 ± 34    |
|           | 16           | ND                             | 42.4 ± 37.2 | 240 ± 16                        | ND                              | 282 ± 52    |
|           | 20           | ND                             | 51.3 ± 14.9 | 326 ± 74                        | ND                              | 378 ± 69    |
| (R)-NNAL  | 1            | ND                             | ND          | 1.7 ± 3.0                       | 12.2 ± 21.1                     | 13.9 ± 19.8 |
|           | 2            | ND                             | ND          | ND                              | ND                              | ND          |
|           | 5            | ND                             | ND          | 10.3 ± 9.3                      | ND                              | 10.3 ± 9.3  |
|           | 10           | ND                             | ND          | 13.7 ± 9.3                      | ND                              | 13.7 ± 12.3 |
|           | 16           | ND                             | ND          | 7.9 ± 13.7                      | ND                              | 7.9 ± 13.7  |
|           | 20           | ND                             | ND          | 3.8 ± 6.6                       | ND                              | 3.8 ± 6.6   |
| (S)-NNAL  | 1            | ND                             | 14.3 ± 13.4 | 31.7 ± 27.5                     | ND                              | 46.0 ± 40.3 |
|           | 2            | ND                             | 24.5 ± 21.3 | 78.1 ± 15.8                     | ND                              | 103 ± 13    |
|           | 5            | ND                             | 22.8 ± 19.8 | 138 ± 19                        | ND                              | 160 ± 5     |
|           | 10           | ND                             | 22.8 ± 19.8 | 185 ± 17                        | ND                              | 208 ± 16    |
|           | 16           | ND                             | 25.6 ± 22.2 | 210 ± 21                        | ND                              | 235 ± 4     |
|           | 20           | ND                             | 27.8 ± 24.1 | 227 ± 24                        | ND                              | 255 ± 34    |

### D. Pancreas

| Treatment | Time (weeks) | POB-DNA adducts (fmol/mg DNA)  |             |                                 |                                 |             |
|-----------|--------------|--------------------------------|-------------|---------------------------------|---------------------------------|-------------|
|           |              | <i>O</i> <sup>2</sup> -POB-Cyt | 7-POB-Gua   | <i>O</i> <sup>2</sup> -POB-dThd | <i>O</i> <sup>6</sup> -POB-dGuo | Total       |
| NNK       | 1            | ND                             | 27.4 ± 0.4  | 38.4 ± 13.5                     | ND                              | 65.7 ± 13.9 |
|           | 2            | ND                             | 32.5 ± 4.4  | 55.1 ± 0.9                      | ND                              | 87.6 ± 3.6  |
|           | 5            | ND                             | 41.0 ± 1.2  | 107 ± 13                        | ND                              | 149 ± 13    |
|           | 10           | ND                             | 41.5 ± 14.1 | 133 ± 3                         | ND                              | 174 ± 17    |
|           | 16           | ND                             | 31.7 ± 2.5  | 150 ± 26                        | ND                              | 182 ± 28    |
|           | 20           | ND                             | 26.7 ± 6.7  | 130 ± 15                        | ND                              | 157 ± 22    |
| (R)-NNAL  | 1            | ND                             | ND          | 2.2 ± 1.9                       | ND                              | 2.2 ± 1.9   |
|           | 2            | ND                             | ND          | 5.0 ± 2.0                       | ND                              | 5.0 ± 2.0   |
|           | 5            | ND                             | ND          | 8.0 ± 2.2                       | ND                              | 8.0 ± 2.2   |
|           | 10           | ND                             | ND          | 11.9 ± 1.9                      | ND                              | 11.9 ± 1.9  |
|           | 16           | ND                             | ND          | 11.9 ± 2.9                      | ND                              | 11.9 ± 2.9  |
|           | 20           | ND                             | ND          | 11.4 ± 2.4                      | ND                              | 11.4 ± 2.4  |
| (S)-NNAL  | 1            | ND                             | 24.2 ± 1.0  | 30.9 ± 2.6                      | ND                              | 55.1 ± 2.1  |
|           | 2            | ND                             | 28.7 ± 6.5  | 51.6 ± 6.7                      | ND                              | 80.3 ± 12.9 |
|           | 5            | ND                             | 31.2 ± 2.2  | 95.7 ± 7.3                      | ND                              | 127 ± 9     |
|           | 10           | ND                             | 40.3 ± 2.0  | 125 ± 16                        | ND                              | 165 ± 15    |
|           | 16           | ND                             | 29.6 ± 4.2  | 131 ± 14                        | ND                              | 161 ± 18    |
|           | 20           | ND                             | 26.4 ± 1.2  | 149 ± 26                        | ND                              | 175 ± 23    |

a. ND, not detected.

**Table 2S.** Levels of PHB-DNA adducts in the nasal olfactory mucosa, nasal respiratory mucosa, oral mucosa, and pancreas of NNK-, (R)-NNAL-, and (S)-NNAL-treated rats.

**A. Nasal olfactory mucosa**

| Treatment | Time (weeks) | PHB-DNA adducts (fmol/mg DNA) |                                 |                                 |             |
|-----------|--------------|-------------------------------|---------------------------------|---------------------------------|-------------|
|           |              | 7-PHB-Gua                     | <i>O</i> <sup>2</sup> -PHB-dThd | <i>O</i> <sup>6</sup> -PHB-dGuo | Total       |
| NNK       | 1            | 58.5 ± 2.3                    | 115 ± 35                        | 21.1 ± 4.3                      | 195 ± 37    |
|           | 2            | 98.7 ± 9.2                    | 164 ± 35                        | 36.5 ± 0.0                      | 299 ± 45    |
|           | 5            | 142 ± 8                       | 93.5 ± 29.6                     | 45.8 ± 2.6                      | 281 ± 19    |
|           | 10           | 93.6 ± 19.2                   | 75.5 ± 49.1                     | 29.6 ± 7.4                      | 199 ± 23    |
|           | 16           | 76.1 ± 7.7                    | 247 ± 310                       | 24.2 ± 6.5                      | 347 ± 325   |
|           | 20           | 83.0 ± 26.2                   | 357 ± 312                       | 20.4 ± 2.4                      | 461 ± 283   |
| (R)-NNAL  | 1            | 410 ± 71                      | 382 ± 173                       | 55.8 ± 8.7                      | 848 ± 111   |
|           | 2            | 543 ± 72                      | 833 ± 97                        | 59.5 ± 6.3                      | 1435 ± 163  |
|           | 5            | 691 ± 148                     | 331 ± 190                       | 43.6 ± 1.7                      | 1065 ± 163  |
|           | 10           | 676 ± 62                      | 629 ± 254                       | 46.6 ± 3.0                      | 1352 ± 319  |
|           | 16           | 490 ± 35                      | 1682 ± 968                      | 32.1 ± 3.6                      | 2204 ± 1007 |
|           | 20           | 439 ± 81                      | 1373 ± 880                      | 23.0 ± 4.0                      | 1835 ± 803  |
| (S)-NNAL  | 1            | 43.4 ± 1.5                    | 117 ± 1                         | 18.4 ± 1.3                      | 179 ± 4     |
|           | 2            | 73.9 ± 0.7                    | 142 ± 22                        | 24.2 ± 6.0                      | 240 ± 29    |
|           | 5            | 84.8 ± 19.6                   | 121 ± 126                       | 27.1 ± 2.1                      | 233 ± 109   |
|           | 10           | 70.0 ± 10.7                   | 75.4 ± 0.2                      | 22.8 ± 5.6                      | 168 ± 16    |
|           | 16           | 63.1 ± 11.4                   | 226 ± 234                       | 18.3 ± 2.0                      | 308 ± 220   |
|           | 20           | 47.5 ± 2.5                    | 260 ± 248                       | 13.0 ± 0.3                      | 321 ± 245   |

**B. Nasal respiratory mucosa**

| Treatment | Time (weeks) | PHB-DNA adducts (fmol/mg DNA) |                                 |                                 |              |
|-----------|--------------|-------------------------------|---------------------------------|---------------------------------|--------------|
|           |              | 7-PHB-Gua                     | <i>O</i> <sup>2</sup> -PHB-dThd | <i>O</i> <sup>6</sup> -PHB-dGuo | Total        |
| NNK       | 1            | 323 ± 19                      | 507 ± 78                        | 161 ± 32                        | 991 ± 27     |
|           | 2            | 569 ± 55                      | 907 ± 190                       | 247 ± 65                        | 1724 ± 310   |
|           | 5            | 687 ± 145                     | 235 ± 175                       | 226 ± 11                        | 1148 ± 308   |
|           | 10           | 435 ± 19                      | 190 ± 62                        | 220 ± 6                         | 845 ± 36     |
|           | 16           | 600 ± 76                      | 1526 ± 1815                     | 340 ± 100                       | 2466 ± 1991  |
|           | 20           | 517 ± 109                     | 1715 ± 1155                     | 285 ± 1                         | 2518 ± 1047  |
| (R)-NNAL  | 1            | 1523 ± 27                     | 1793 ± 587                      | 330 ± 92                        | 3646 ± 706   |
|           | 2            | 2346 ± 675                    | 4154 ± 214                      | 457 ± 76                        | 6957 ± 537   |
|           | 5            | 3567 ± 1000                   | 1955 ± 55                       | 400 ± 12                        | 5921 ± 1067  |
|           | 10           | 3525 ± 192                    | 3565 ± 993                      | 401 ± 27                        | 7491 ± 773   |
|           | 16           | 3563 ± 945                    | 10110 ± 2100                    | 338 ± 83                        | 14010 ± 1070 |
|           | 20           | 3300 ± 446                    | 9014 ± 7497                     | 306 ± 18                        | 12620 ± 7033 |
| (S)-NNAL  | 1            | 295 ± 22                      | 475 ± 33                        | 147 ± 7                         | 917 ± 62     |
|           | 2            | 366 ± 79                      | 750 ± 127                       | 201 ± 33                        | 1318 ± 172   |
|           | 5            | 455 ± 8                       | 582 ± 638                       | 317 ± 9                         | 1354 ± 655   |
|           | 10           | 495 ± 96                      | 244 ± 176                       | 269 ± 5                         | 1007 ± 267   |
|           | 16           | 382 ± 104                     | 1275 ± 1331                     | 246 ± 61                        | 1903 ± 1495  |
|           | 20           | 454 ± 85                      | 1401 ± 913                      | 272 ± 9                         | 2127 ± 837   |

### C. Oral mucosa

| Treatment | Time (weeks) | PHB-DNA adducts (fmol/mg DNA) |                                 |                                 |              |
|-----------|--------------|-------------------------------|---------------------------------|---------------------------------|--------------|
|           |              | 7-PHB-Gua                     | <i>O</i> <sup>2</sup> -PHB-dThd | <i>O</i> <sup>6</sup> -PHB-dGuo | Total        |
| NNK       | 1            | ND <sup>a</sup>               | ND                              | ND                              | ND           |
|           | 2            | ND                            | ND                              | ND                              | ND           |
|           | 5            | ND                            | 33.9 ± 23.1                     | ND                              | 33.9 ± 23.1  |
|           | 10           | ND                            | 15.7 ± 12.1                     | ND                              | 15.7 ± 12.1  |
|           | 16           | ND                            | 99.9 ± 127.9                    | ND                              | 99.9 ± 127.9 |
|           | 20           | ND                            | 139 ± 197                       | ND                              | 139 ± 197    |
| (R)-NNAL  | 1            | ND                            | ND                              | ND                              | ND           |
|           | 2            | ND                            | 133 ± 188                       | 10.7 ± 15.2                     | 144 ± 203    |
|           | 5            | 205 ± 28                      | 72.2 ± 44.8                     | 19.6 ± 5.1                      | 297 ± 12     |
|           | 10           | 110 ± 156                     | 188 ± 266                       | 31.1 ± 0.9                      | 330 ± 421    |
|           | 16           | 187 ± 13                      | 834 ± 267                       | ND                              | 1020 ± 280   |
|           | 20           | 189 ± 49                      | 844 ± 585                       | ND                              | 1033 ± 536   |
| (S)-NNAL  | 1            | ND                            | ND                              | ND                              | ND           |
|           | 2            | ND                            | ND                              | ND                              | ND           |
|           | 5            | ND                            | ND                              | ND                              | ND           |
|           | 10           | ND                            | 14.7 ± 2.1                      | ND                              | 14.7 ± 2.1   |
|           | 16           | ND                            | 86.1 ± 111.6                    | ND                              | 86.1 ± 111.6 |
|           | 20           | ND                            | ND                              | ND                              | ND           |

### D. Pancreas

| Treatment | Time (weeks) | PHB-DNA adducts (fmol/mg DNA) |                                 |                                 |             |
|-----------|--------------|-------------------------------|---------------------------------|---------------------------------|-------------|
|           |              | 7-PHB-Gua                     | <i>O</i> <sup>2</sup> -PHB-dThd | <i>O</i> <sup>6</sup> -PHB-dGuo | Total       |
| NNK       | 1            | ND                            | ND                              | ND                              | ND          |
|           | 2            | ND                            | 25.0 ± 1.4                      | ND                              | 25.0 ± 1.4  |
|           | 5            | 11.9 ± 10.4                   | 41.9 ± 10.8                     | ND                              | 53.8 ± 16.5 |
|           | 10           | ND                            | 107 ± 34                        | ND                              | 107 ± 34    |
|           | 16           | 19.2 ± 5.5                    | 109 ± 5                         | ND                              | 128 ± 9     |
|           | 20           | 13.6 ± 12.0                   | 113 ± 10                        | ND                              | 126 ± 15    |
| (R)-NNAL  | 1            | 47.6 ± 16.2                   | 67.7 ± 8.4                      | 4.6 ± 0.7                       | 120 ± 25    |
|           | 2            | 70.0 ± 0.6                    | 110 ± 16                        | 4.2 ± 0.6                       | 184 ± 16    |
|           | 5            | 91.2 ± 11.8                   | 249 ± 48                        | 6.2 ± 2.0                       | 346 ± 54    |
|           | 10           | 97.5 ± 14.2                   | 373 ± 56                        | 3.6 ± 3.1                       | 474 ± 60    |
|           | 16           | 94.0 ± 10.4                   | 445 ± 35                        | 4.9 ± 1.0                       | 544 ± 34    |
|           | 20           | 73.0 ± 17.7                   | 475 ± 73                        | 4.1 ± 1.1                       | 552 ± 82    |
| (S)-NNAL  | 1            | ND                            | 6.0 ± 10.4                      | ND                              | 6.0 ± 10.4  |
|           | 2            | ND                            | 36.4 ± 5.6                      | ND                              | 36.4 ± 5.6  |
|           | 5            | 5.0 ± 8.7                     | 50.4 ± 11.3                     | ND                              | 55.5 ± 19.9 |
|           | 10           | ND                            | 59.1 ± 13.0                     | ND                              | 59.1 ± 13.0 |
|           | 16           | 9.6 ± 8.6                     | 87.9 ± 24.1                     | ND                              | 97.5 ± 32.3 |
|           | 20           | ND                            | 90.9 ± 4.6                      | ND                              | 90.9 ± 4.6  |

a. ND, not detected.
